# Supplementary material
Source: PubMed Central journal article supplement (PMC2754619)

| Sample                       | $C_T$ for <i>40S</i> (internal reference gene) |                 |
|------------------------------|------------------------------------------------|-----------------|
|                              | Control                                        | Stimulated 24 h |
| Latex cDNA (test)            | 17.94 ± 0.07                                   | 17.93 ± 0.10    |
| Inner bark cDNA (calibrator) | 24.81 ± 0.18                                   | 24.89 ± 0.08    |

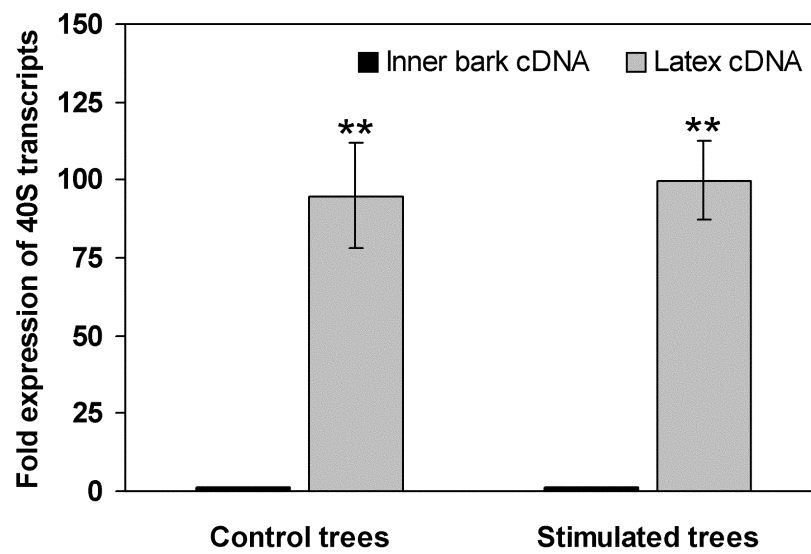

Supplement: pp.109.140228_1.pdf [file pp.109.140228_1.pdf]
