# Supplementary material
Source: PubMed Central journal article supplement (PMC2754619)
Supplement: pp.109.140228_5.pdf [file pp.109.140228_5.pdf]

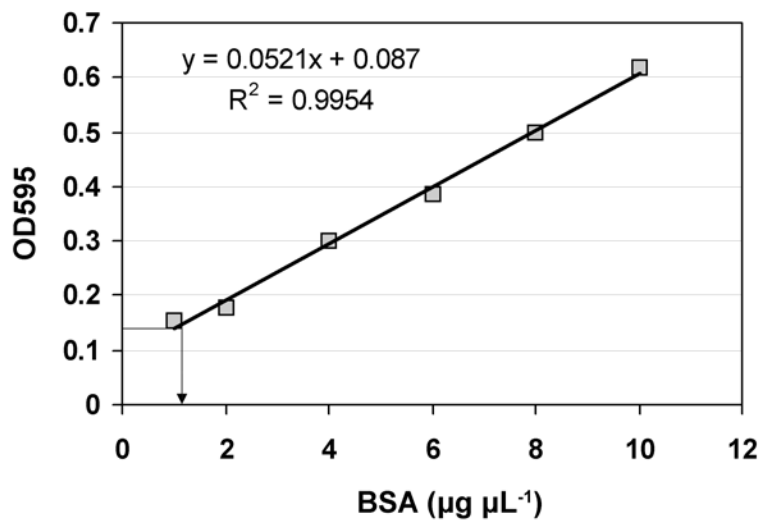

| Sample                                  | Membrane protein concentration ( $\mu\text{g } \mu\text{L}^{-1}$ ) |
|-----------------------------------------|--------------------------------------------------------------------|
| 0 h- control trees                      | 0.110                                                              |
| 4 h-Ethrel <sup>®</sup> -treated trees  | 0.113                                                              |
| 24 h-Ethrel <sup>®</sup> -treated trees | 0.109                                                              |
