# Supplementary material
Source: PubMed Central journal article supplement (PMC2754619)
Supplement: pp.109.140228_6.pdf [file pp.109.140228_6.pdf]

---

| Gene            | Primer                                                                       |
|-----------------|------------------------------------------------------------------------------|
| <i>HbPIP1;1</i> | Forward ; 5'-GGCATTTCAGGAGGTCACAT-3'<br>Reverse ; 5'-AAGGTGCCAACAATTCAGC-3'  |
| <i>HbPIP2;1</i> | Forward ; 5'-TGCCGCAATTGCTGCATTCT-3'<br>Reverse ; 5'-AAAACCATGAACCCAAGCAC-3' |
| <i>HbTIP1;1</i> | Forward ; 5'-CTGGTTTCGCACTCTCTTCC-3'<br>Reverse ; 5'-GACACCGCTGGGTTCATC-3'   |
| <i>40S</i>      | Forward ; 5'-ACAGGCTCATCACCTCCAAG-3'<br>Reverse ; 5'-CAACCACAAAAGTGCAATGG-3' |

---
