# Supplementary material
Source: PubMed Central journal article supplement (PMC2754619)

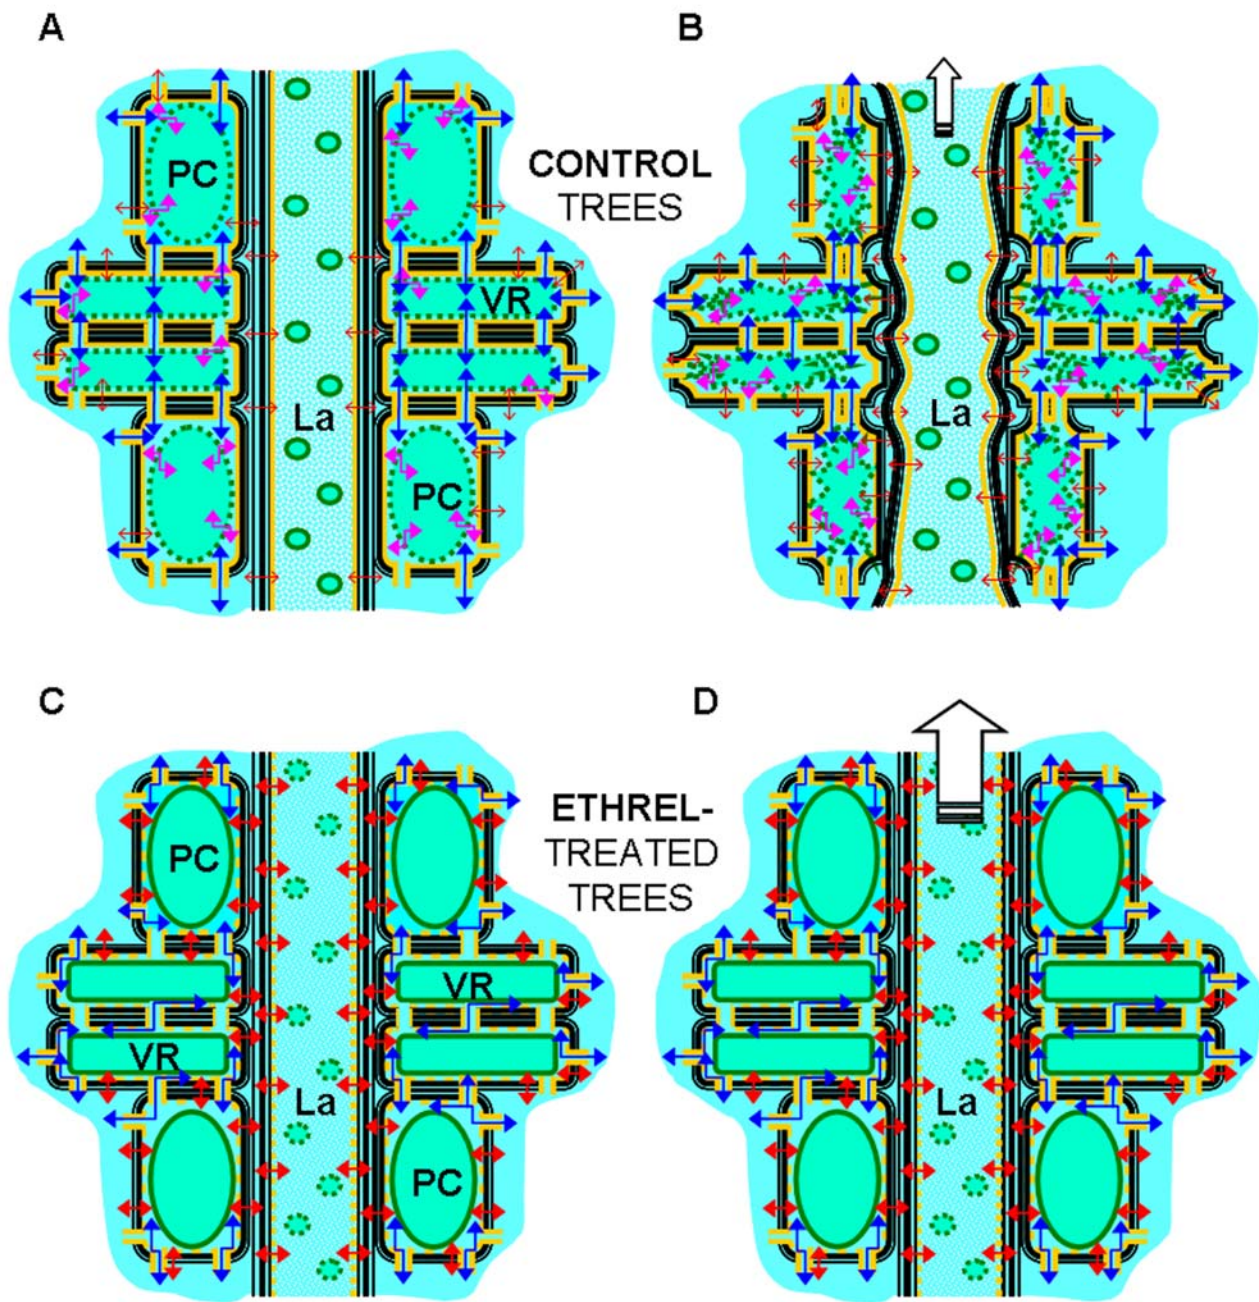

Supplement 4

Supplement: pp.109.140228_4.pdf [file pp.109.140228_4.pdf]
